# Supplementary material for: Direct determination of lead in bones using slurry sampling and high-resolution continuum source electrothermal atomic absorption spectrometry
Source: Royal Society of Chemistry journal article supplement (doi:10.1039/c8ay02555j), 2019-01-01
Supplement: c8ay02555j1.pdf [file c8ay02555j1.pdf]

## Supplementary Information

### **„Direct determination of lead in bones using slurry sampling high-resolution continuum source electrothermal atomic absorption spectrometry“**

Lenka Husáková\*, Tereza Šídová, Lucie Ibrahimová, Monika Svízelová,  
Tomáš Mikysek

*Department of Analytical Chemistry, Faculty of Chemical Technology, University of Pardubice, Pardubice, Studentska  
573 HB/D, CZ-532 10, Czech Republic. Tel. +420 466 037 029; Fax: +420 466 037 068;  
E-mail address: Lenka.Husakova@upce.cz*

**Figure S1** Bone sample preparation and processing: (a) a rib sample with remnants of adherent tissue, (b) sample of the rib after cleaning with a ceramic knife, (c) bone specimens in sterile freeze-drying containers, (d) freeze dried bone sample, (e) a stainless steel vial (1" height x 1/2" diameter) with stainless steel ball pestle (1/4" diameter), (f) resulting sample after 5 min of grinding time, scale given by CZ coin of 23 mm diameter.

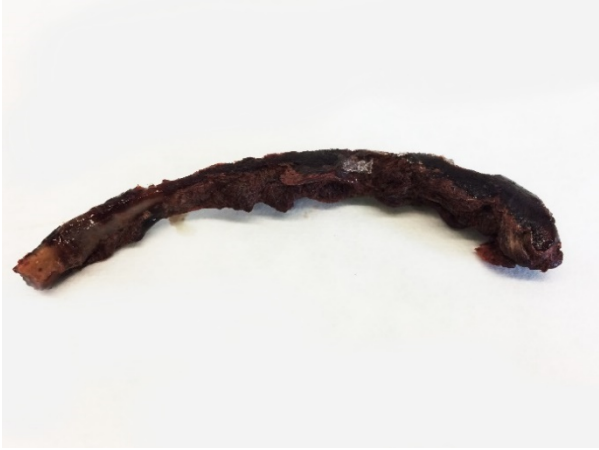

a

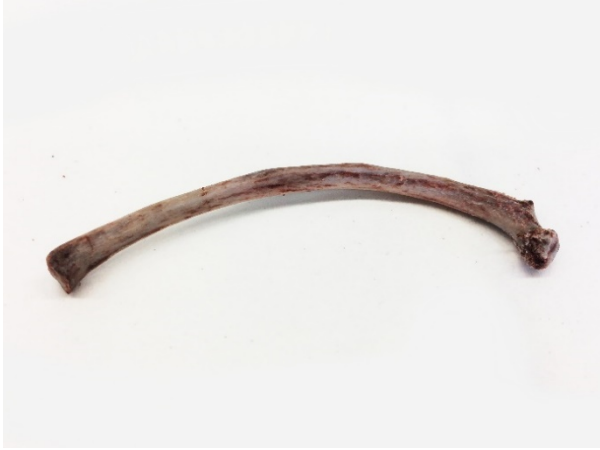

b

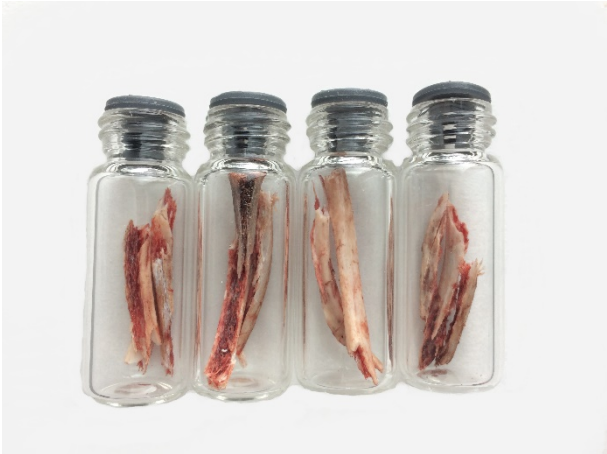

c

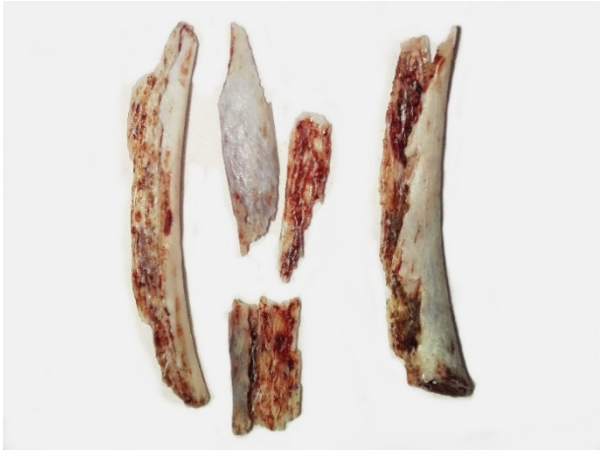

d

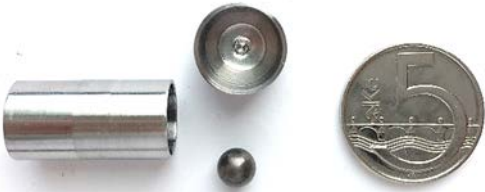

e

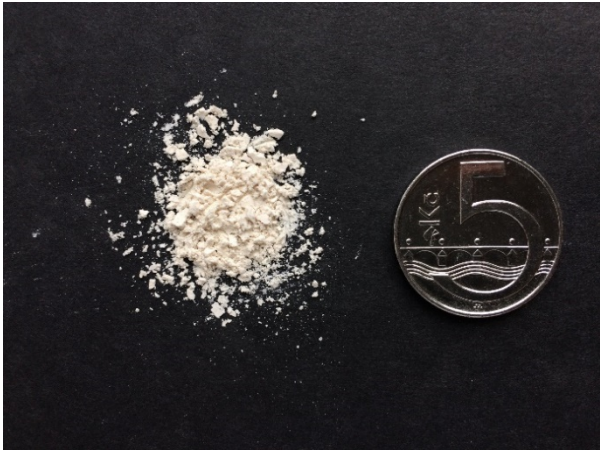

f

**Figure S2.** Absorbance spectra of PO recorded at different temperatures in the vicinity of the lead line at 217.001 nm

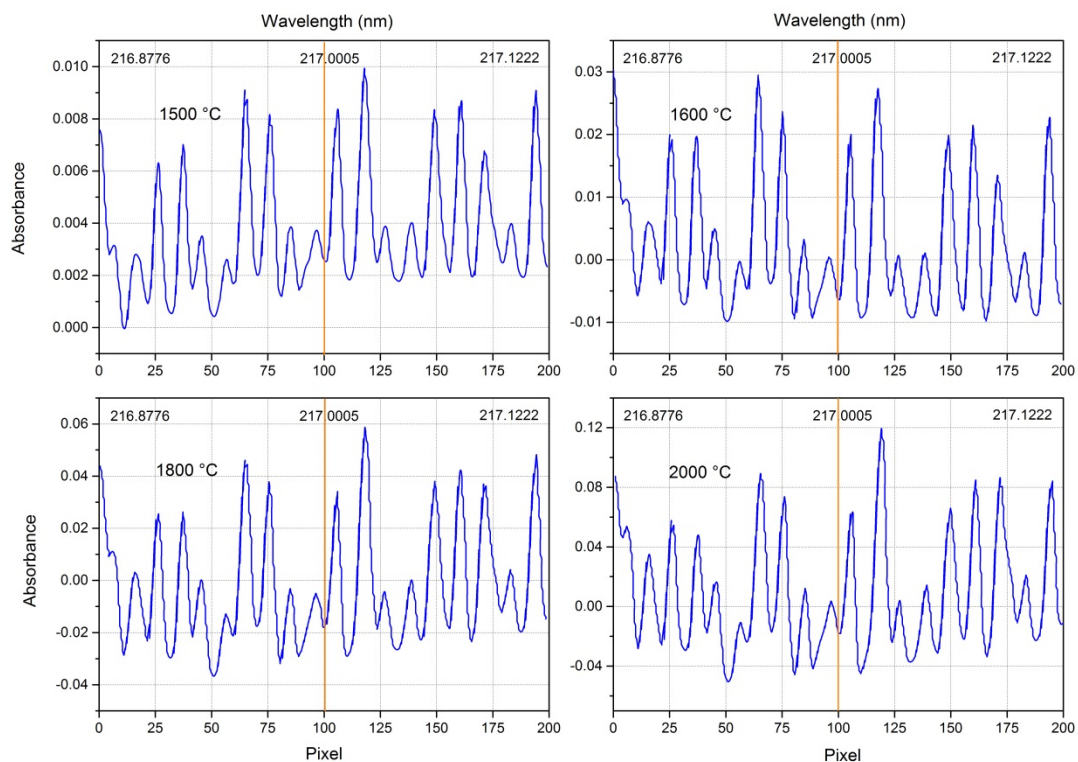

**Figure S3.** The influence of the amount of hydroxyapatite on the integrated absorbance determined at the Pb line 217.001 nm in the presence of 1  $\mu\text{g}$  Pd + 50  $\mu\text{g}$  citric acid for reagent blank samples without (black line) and with the use of automatic correction with the use of reference PO spectra and a least-square algorithm (red line). Pyrolysis and atomization temperature was 1000 and 2100  $^{\circ}\text{C}$ , respectively.

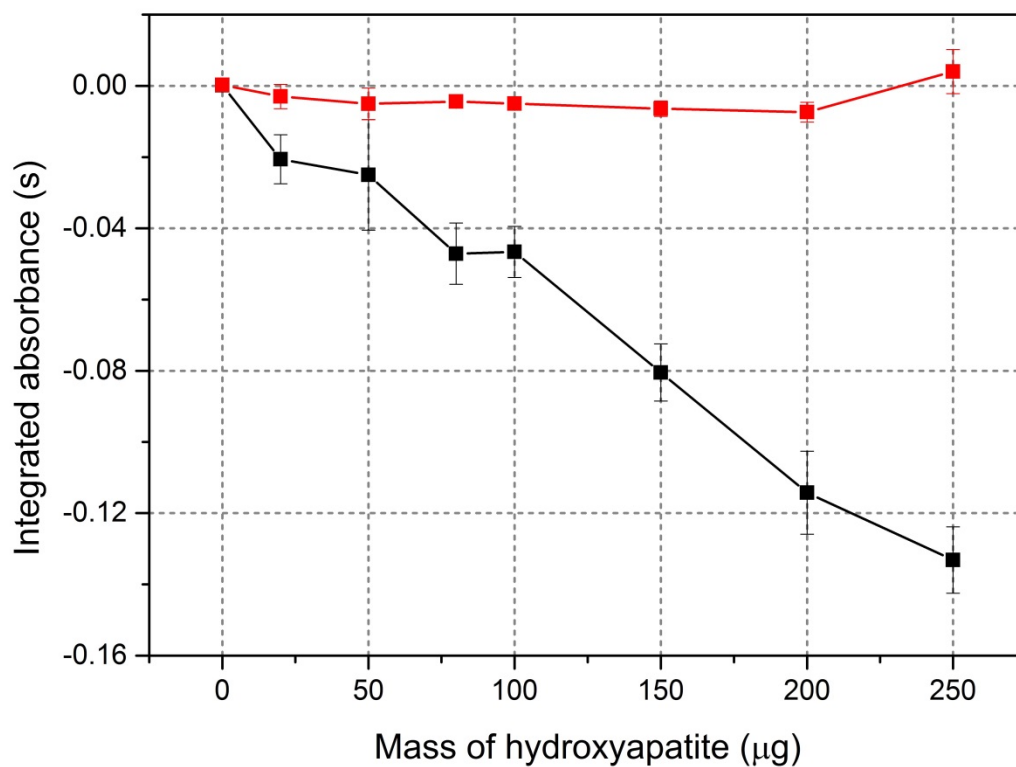

**Figure S4a.** X-ray diffractogram of NIST SRM® 1486

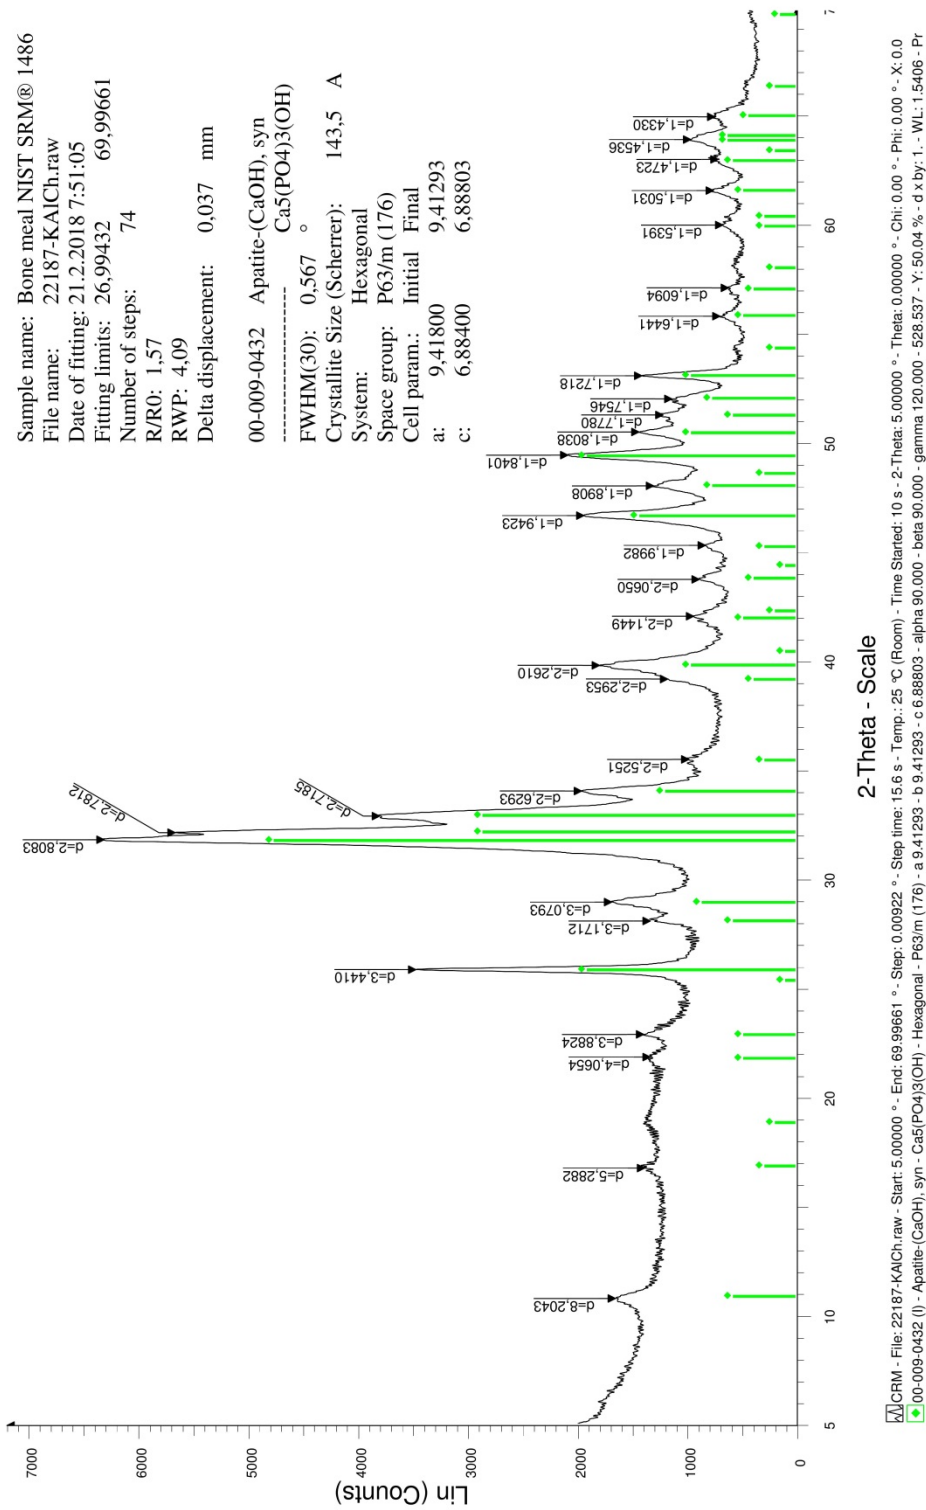

**Figure S4b.** X-ray diffractogram of rabbit rib bone

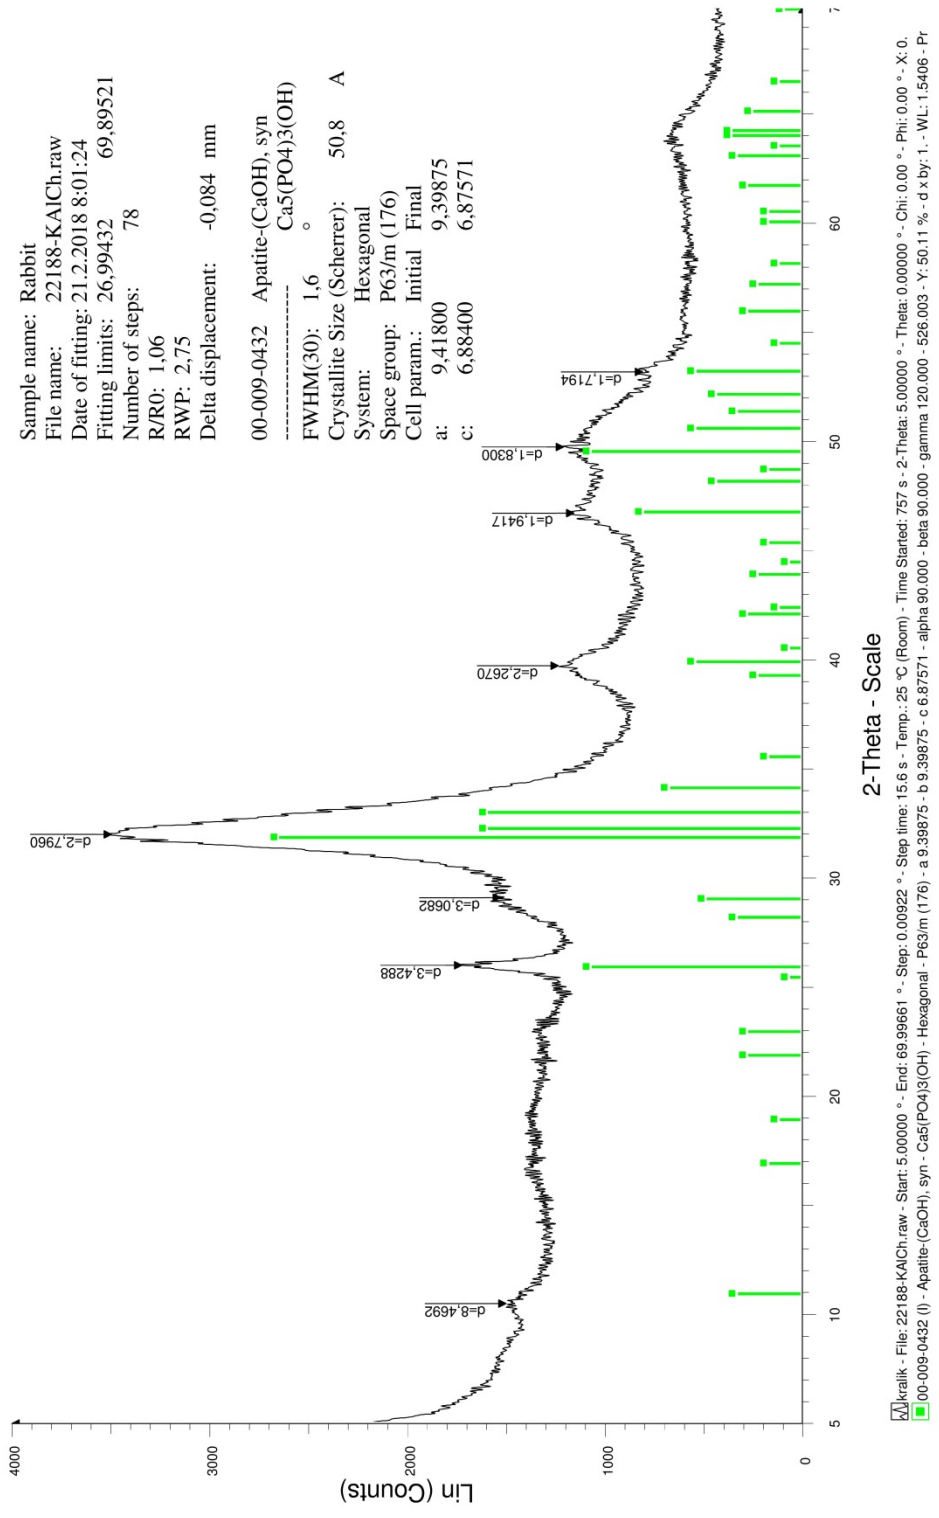

**Figure S4c.** X-ray diffractogram of a river otter rib bone

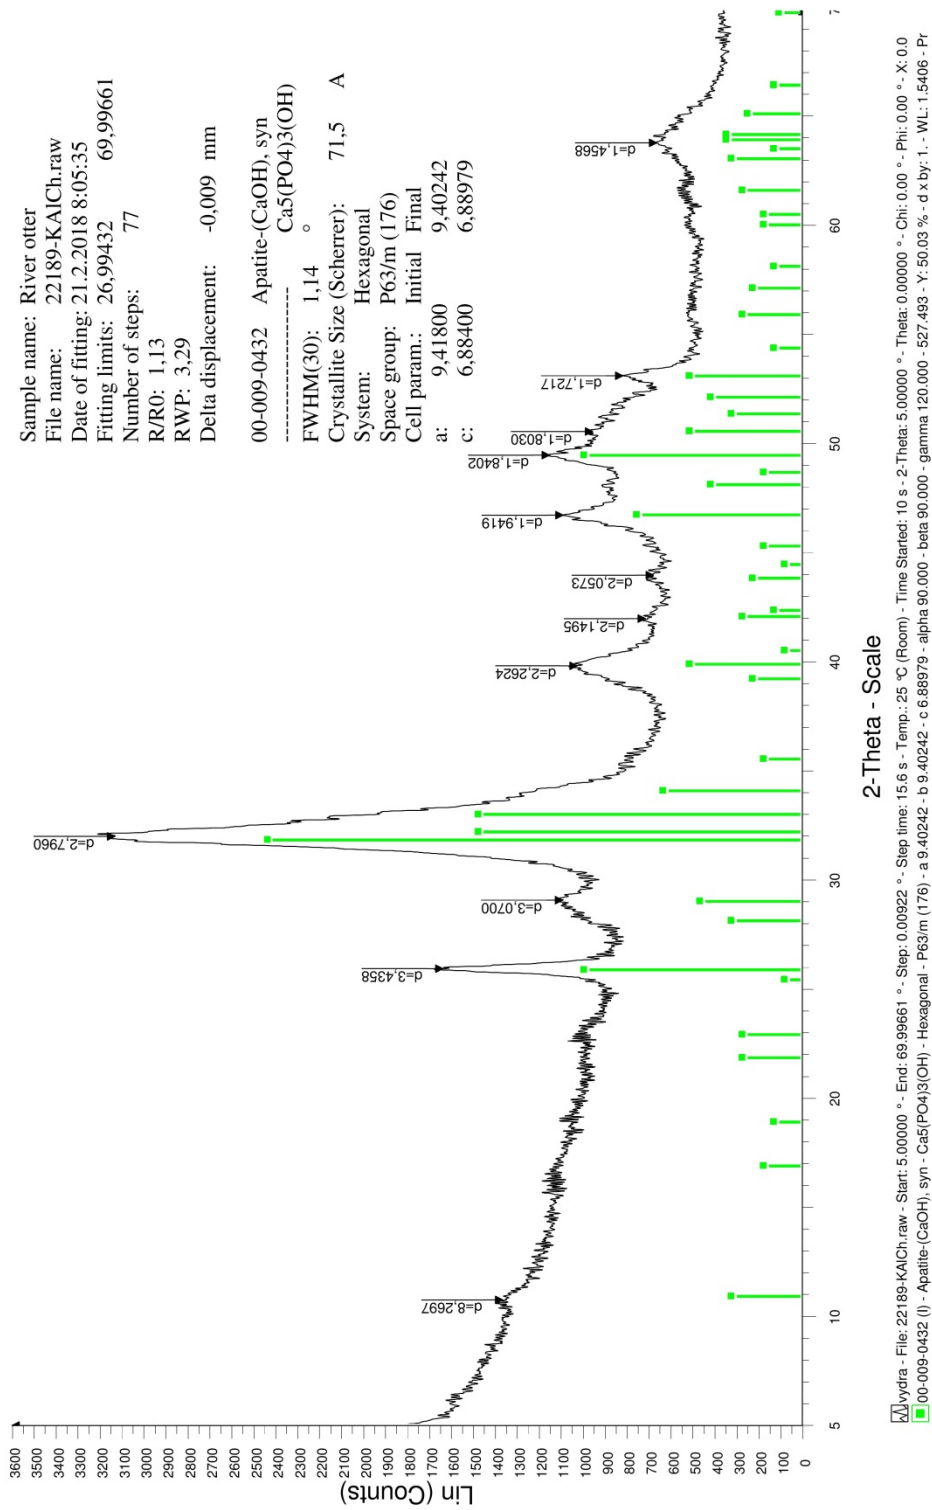

**Fig.S5** Effect of grinding time on the particle size distribution of rabbit (red line) and otter (blue line) bones

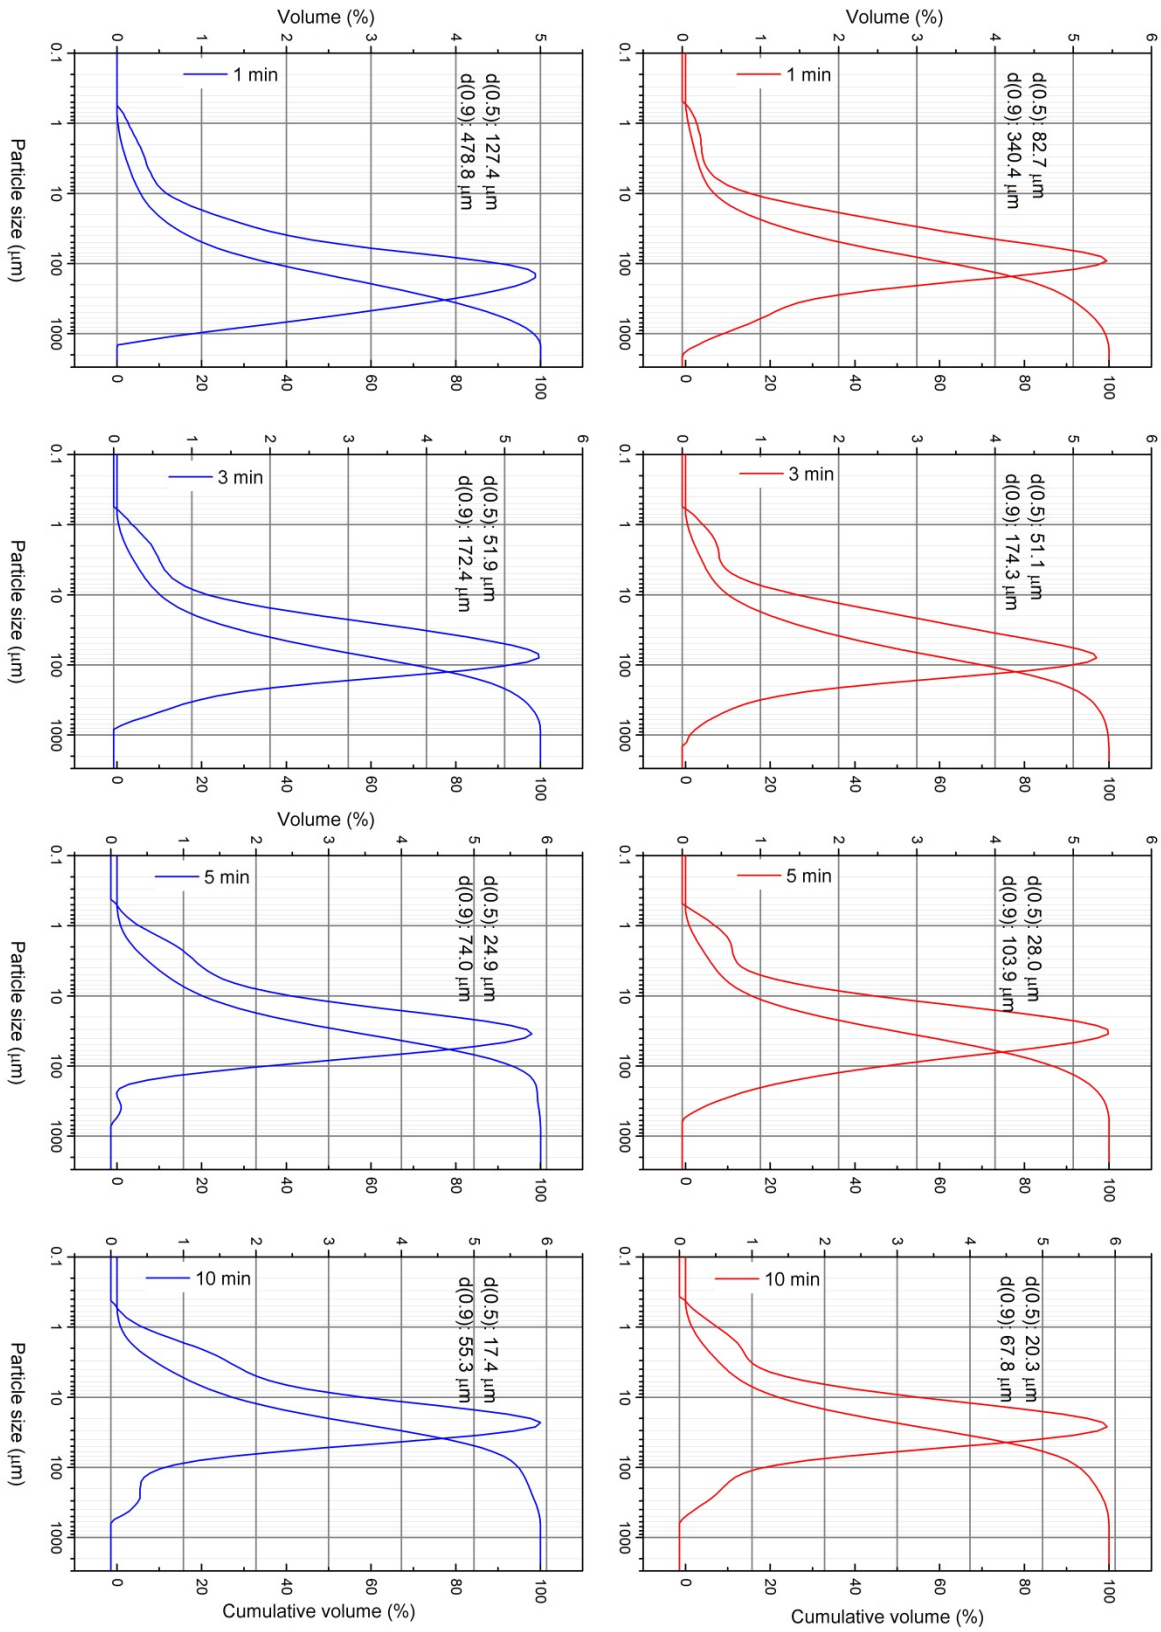



**Fig.S6** SEM images of (A) rabbit and (B) river otter bone after 3 min of grinding

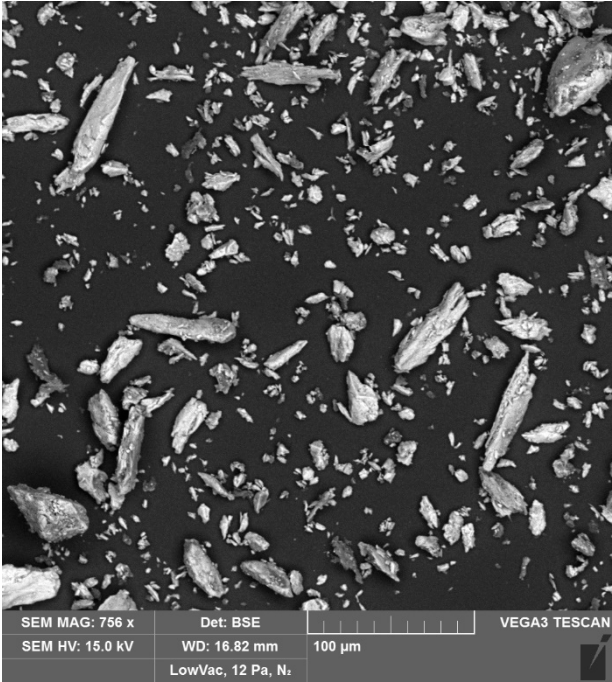

A

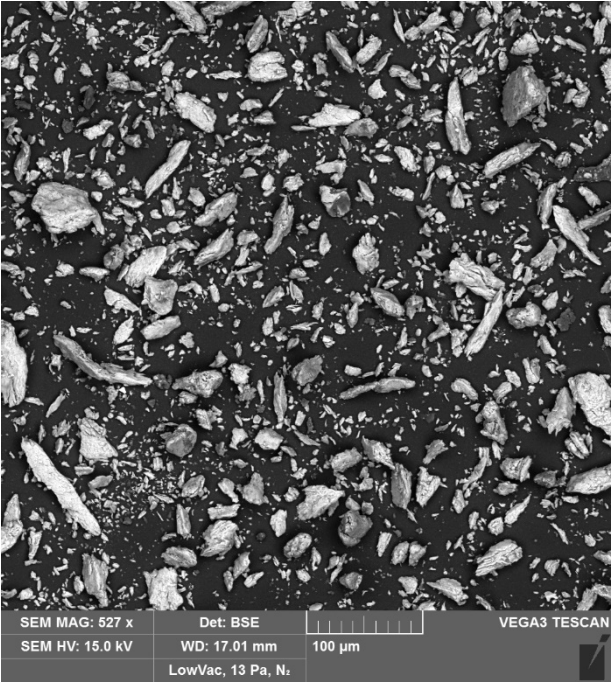

B

**Figure S7.** The effect of pyrolysis (A) and atomization (B) temperature on the integrated absorbance of 200 pg Pb in aqueous standard without (○) and with 1 μg Pd + 50 μg citric acid (●) chemical modifier.

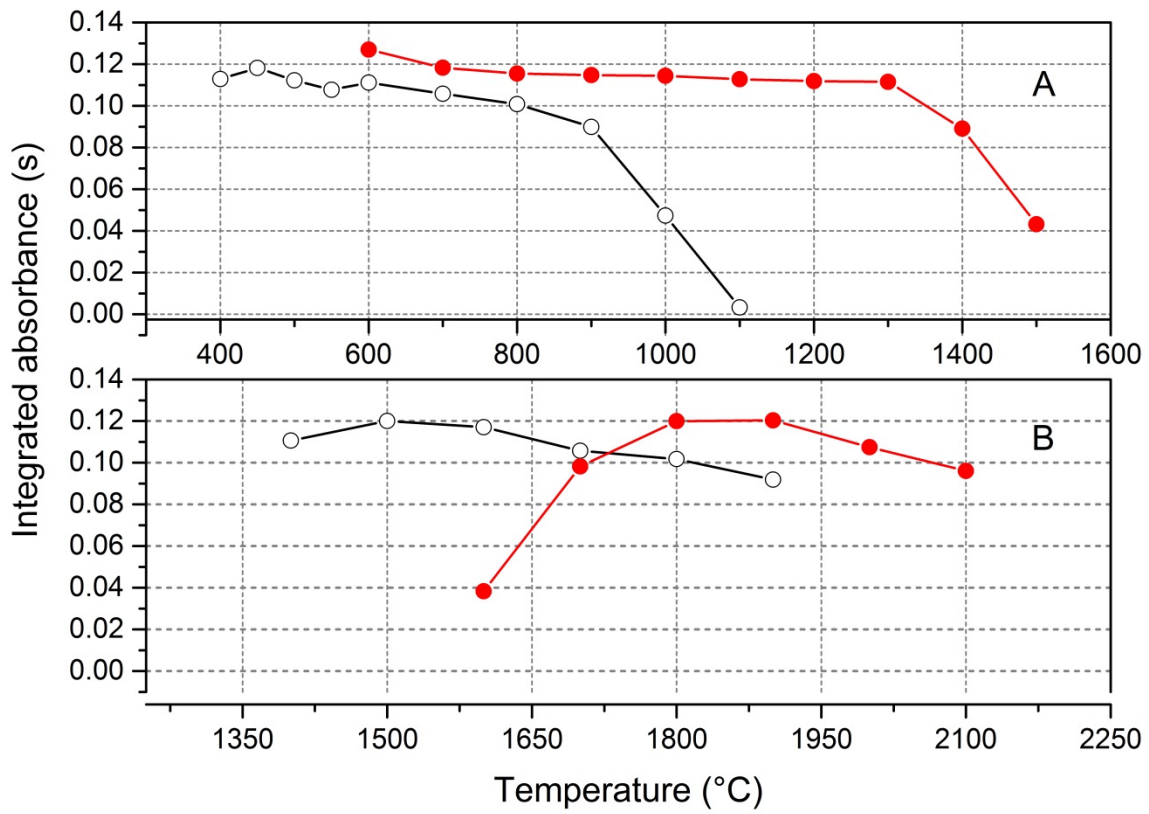

**Table S1.** Design and experimental results<sup>a</sup> for analysis of Pb in NIST SRM 1486 Bone Meal

| Exp.   | Replic. | Glycerol (%) | HNO <sub>3</sub> (%) | Sonication (min) | Particles (μm) | Tp (°C) | Ta (°C) | Modifier (μL) | Integrated absorbance |
|--------|---------|--------------|----------------------|------------------|----------------|---------|---------|---------------|-----------------------|
| 2      | 1       | 20.0         | 0.0                  | 2.0              | 54             | 900     | 2100    | 10            | 0.0409                |
| 11 (C) | 1       | 10.0         | 2.5                  | 6.0              | 160            | 1150    | 1800    | 6             | 0.1297                |
| 23     | 3       | 0.0          | 0.0                  | 2.0              | 315            | 1400    | 2100    | 2             | 0.0040                |
| 26     | 3       | 20.0         | 5.0                  | 2.0              | 315            | 900     | 1500    | 2             | 0.1476                |
| 13     | 2       | 20.0         | 0.0                  | 2.0              | 54             | 900     | 2100    | 10            | 0.0367                |
| 16     | 2       | 0.0          | 0.0                  | 10.0             | 315            | 900     | 1500    | 10            | 0.0158                |
| 17     | 2       | 20.0         | 0.0                  | 10.0             | 54             | 1400    | 1500    | 2             | 0.0040                |
| 22 (C) | 2       | 10.0         | 2.5                  | 6.0              | 160            | 1150    | 1800    | 6             | 0.1340                |
| 1      | 1       | 0.0          | 0.0                  | 2.0              | 315            | 1400    | 2100    | 2             | 0.0055                |
| 12     | 2       | 0.0          | 0.0                  | 2.0              | 315            | 1400    | 2100    | 2             | 0.0040                |
| 28     | 3       | 20.0         | 0.0                  | 10.0             | 54             | 1400    | 1500    | 2             | 0.0030                |
| 32 (C) | 3       | 10.0         | 2.5                  | 6.0              | 160            | 1150    | 1800    | 6             | 0.1316                |
| 20 (C) | 2       | 10.0         | 2.5                  | 6.0              | 160            | 1150    | 1800    | 6             | 0.1325                |
| 8      | 1       | 20.0         | 5.0                  | 10.0             | 315            | 1400    | 2100    | 10            | 0.0584                |
| 33 (C) | 3       | 10.0         | 2.5                  | 6.0              | 160            | 1150    | 1800    | 6             | 0.1203                |
| 14     | 2       | 0.0          | 5.0                  | 2.0              | 54             | 1400    | 1500    | 10            | 0.0305                |
| 19     | 2       | 20.0         | 5.0                  | 10.0             | 315            | 1400    | 2100    | 10            | 0.0466                |
| 30     | 3       | 20.0         | 5.0                  | 10.0             | 315            | 1400    | 2100    | 10            | 0.0472                |
| 27     | 3       | 0.0          | 0.0                  | 10.0             | 315            | 900     | 1500    | 10            | 0.0457                |
| 4      | 1       | 20.0         | 5.0                  | 2.0              | 315            | 900     | 1500    | 2             | 0.1303                |
| 21 (C) | 2       | 10.0         | 2.5                  | 6.0              | 160            | 1150    | 1800    | 6             | 0.1065                |
| 9 (C)  | 1       | 10.0         | 2.5                  | 6.0              | 160            | 1150    | 1800    | 6             | 0.1191                |
| 25     | 3       | 0.0          | 5.0                  | 2.0              | 54             | 1400    | 1500    | 10            | 0.0225                |
| 31 (C) | 3       | 10.0         | 2.5                  | 6.0              | 160            | 1150    | 1800    | 6             | 0.1237                |
| 6      | 1       | 20.0         | 0.0                  | 10.0             | 54             | 1400    | 1500    | 2             | 0.0017                |
| 3      | 1       | 0.0          | 5.0                  | 2.0              | 54             | 1400    | 1500    | 10            | 0.0300                |
| 7      | 1       | 0.0          | 5.0                  | 10.0             | 54             | 900     | 2100    | 2             | 0.1288                |
| 15     | 2       | 20.0         | 5.0                  | 2.0              | 315            | 900     | 1500    | 2             | 0.1233                |
| 29     | 3       | 0.0          | 5.0                  | 10.0             | 54             | 900     | 2100    | 2             | 0.1262                |
| 24     | 3       | 20.0         | 0.0                  | 2.0              | 54             | 900     | 2100    | 10            | 0.0400                |
| 18     | 2       | 0.0          | 5.0                  | 10.0             | 54             | 900     | 2100    | 2             | 0.1217                |
| 5      | 1       | 0.0          | 0.0                  | 10.0             | 315            | 900     | 1500    | 10            | 0.0261                |
| 10 (C) | 1       | 10.0         | 2.5                  | 6.0              | 160            | 1150    | 1800    | 6             | 0.1271                |

<sup>a</sup> Results are presented as integrated absorbances evaluated as the means of 3 consecutive analytical runs.

Tp and Ta: pyrolysis and atomization temperature, respectively.

**Table S2.** Determination of Ca, P, Na and Mg in NIST SRM 1486 Bone Meal, rabbit and otter ribs by EDX

| Constituent element | Mass fraction (%) |              |              |
|---------------------|-------------------|--------------|--------------|
|                     | SRM               | Rabbit       | River otter  |
| Ca                  | 25.82 ± 0.66      | 25.02 ± 0.64 | 29.08 ± 0.83 |
| P                   | 12.26 ± 0.41      | 10.17 ± 0.34 | 9.97 ± 0.38  |
| Na                  | 0.49 ± 0.06       | 0.54 ± 0.06  | 0.74 ± 0.07  |
| Mg                  | 0.42 ± 0.05       | 0.46 ± 0.05  | 0.27 ± 0.04  |

Certified<sup>a</sup> or information<sup>b</sup> mass fraction values (Dry-Mass Basis) for SRM 1486: Ca<sup>a</sup>: 26.58 ± 0.24 %, Mg<sup>a</sup>: 0.466 ± 0.017 %, P<sup>a</sup>: 12.30 ± 0.19 %, Na<sup>b</sup>: 0.5 %

**Table S3.** Analysis of variance (ANOVA) for Response Surface Quadratic Model

| Source                                                         | DF | Adj SS   | Adj MS   | F-value | p-value <sup>a</sup> |
|----------------------------------------------------------------|----|----------|----------|---------|----------------------|
| Model                                                          | 8  | 0.089235 | 0.011154 | 172.63  | 0.000                |
| Linear                                                         | 4  | 0.053645 | 0.013411 | 207.56  | 0.000                |
| x <sub>1</sub> (Glycerol)                                      | 1  | 0.000589 | 0.000589 | 9.12    | 0.006                |
| x <sub>2</sub> (HNO <sub>3</sub> )                             | 1  | 0.025722 | 0.025722 | 398.09  | 0.000                |
| x <sub>3</sub> (Tp)                                            | 1  | 0.021943 | 0.021943 | 339.61  | 0.000                |
| x <sub>4</sub> (Modifier)                                      | 1  | 0.005391 | 0.005391 | 83.43   | 0.000                |
| Square                                                         | 1  | 0.035127 | 0.035127 | 543.64  | 0.000                |
| x <sub>1</sub> (Glycerol) × x <sub>1</sub> (Glycerol)          | 1  | 0.035127 | 0.035127 | 543.64  | 0.000                |
| 2-Way Interaction <sup>b</sup>                                 | 3  | 0.000463 | 0.000154 | 2.39    | 0.094                |
| x <sub>1</sub> (Glycerol) × x <sub>2</sub> (HNO <sub>3</sub> ) | 1  | 0.000196 | 0.000196 | 3.03    | 0.095                |
| x <sub>1</sub> (Glycerol) × x <sub>3</sub> (Tp)                | 1  | 0.000004 | 0.000004 | 0.06    | 0.804                |
| x <sub>1</sub> (Glycerol) × x <sub>4</sub> (Modifier)          | 1  | 0.000263 | 0.000263 | 4.08    | 0.055                |
| Error                                                          | 24 | 0.001551 | 0.000065 |         |                      |
| Total                                                          | 32 | 0.090786 |          |         |                      |

Model Summary: R<sup>2</sup> = 98.3 %; R<sup>2</sup>(adj) = 97.7 %; R<sup>2</sup>(pred) = 96.8 %, where: R<sup>2</sup> is the percentage of variation in the response that is explained by the model, R<sup>2</sup>(adj) is the percentage of the variation in the response that is explained by the model, adjusted for the number of predictors in the model relative to the number of observations, R<sup>2</sup>(pred) provides a measure of how well the regression model predicts the response outside the range of data sample used for the regression.

<sup>a</sup> Parameter is statistically insignificant at significance level 0.05 when its p-value is above 0.05

<sup>b</sup> The following terms cannot be estimated and were removed: x<sub>2</sub> × x<sub>2</sub> (HNO<sub>3</sub> × HNO<sub>3</sub>); x<sub>3</sub> × x<sub>3</sub> (Tp × Tp); x<sub>4</sub> × x<sub>4</sub> (Modifier × Modifier); x<sub>2</sub> × x<sub>3</sub> (HNO<sub>3</sub> × Tp); x<sub>2</sub> × x<sub>4</sub> (HNO<sub>3</sub> × Modifier); x<sub>3</sub> × x<sub>4</sub> (Tp × Modifier).
